# Supplementary material for: Sequential enrichment at the nuclear periphery of H2A.Zac and H3K9me2 accompanies pluripotency loss in human embryonic stem cells
Source: bioRxiv or medRxiv preprint supplement (doi:10.1101/2020.02.15.951103), 2020-02-16
Supplement: Supplementary file [file media-1.pdf]

## Supplemental Data S1: Sequences (5'—3') for oligonucleotide RNA FISH

| Sequence              | Sequence Name     | Scale   | Purification | Three Modificatic | MW Backbone |
|-----------------------|-------------------|---------|--------------|-------------------|-------------|
| agtccagcagaacgttaaaa  | nanog-pmc-mrna_1  | 30 nmol | Desalted     | T(CAL Fluor Red   | 7293.03     |
| aataacatgaggcaaccaggc | nanog-pmc-mrna_2  | 30 nmol | Desalted     | T(CAL Fluor Red   | 7278.01     |
| ggataaagtgagttgcctgc  | nanog-pmc-mrna_3  | 30 nmol | Desalted     | T(CAL Fluor Red   | 7347.04     |
| taggacctccagaaggaaaa  | nanog-pmc-mrna_4  | 30 nmol | Desalted     | T(CAL Fluor Red   | 7318.04     |
| ggtaaggcagcttaagac    | nanog-pmc-mrna_5  | 30 nmol | Desalted     | T(CAL Fluor Red   | 7331.04     |
| ggatccacactcatgttagt  | nanog-pmc-mrna_6  | 30 nmol | Desalted     | T(CAL Fluor Red   | 7241.97     |
| aaggcaagctttggggacaa  | nanog-pmc-mrna_7  | 30 nmol | Desalted     | T(CAL Fluor Red   | 7365.06     |
| ctttacagtcggatgctca   | nanog-pmc-mrna_8  | 30 nmol | Desalted     | T(CAL Fluor Red   | 7232.96     |
| aatcacaggcataggtgaag  | nanog-pmc-mrna_9  | 30 nmol | Desalted     | T(CAL Fluor Red   | 7349.06     |
| ggatagttttctcaggccc   | nanog-pmc-mrna_10 | 30 nmol | Desalted     | T(CAL Fluor Red   | 7248.96     |
| agcagaagacatttgaagg   | nanog-pmc-mrna_11 | 30 nmol | Desalted     | T(CAL Fluor Red   | 7349.06     |
| cagtctccgtgtgaggcatc  | nanog-pmc-mrna_12 | 30 nmol | Desalted     | T(CAL Fluor Red   | 7258.95     |
| gctgtcctgaataagcagat  | nanog-pmc-mrna_13 | 30 nmol | Desalted     | T(CAL Fluor Red   | 7291.01     |
| cgacactattctctcgagaa  | nanog-pmc-mrna_14 | 30 nmol | Desalted     | T(CAL Fluor Red   | 7210.95     |
| gtttctgactgggaccttg   | nanog-pmc-mrna_15 | 30 nmol | Desalted     | T(CAL Fluor Red   | 7279.98     |
| ggaagagaacacagttctgg  | nanog-pmc-mrna_16 | 30 nmol | Desalted     | T(CAL Fluor Red   | 7365.06     |
| cattgagtacacacagctgg  | nanog-pmc-mrna_17 | 30 nmol | Desalted     | T(CAL Fluor Red   | 7275.99     |
| tgttgagagttcttgcac    | nanog-pmc-mrna_18 | 30 nmol | Desalted     | T(CAL Fluor Red   | 7304.01     |
| cctgtttgtagctgaggttc  | nanog-pmc-mrna_19 | 30 nmol | Desalted     | T(CAL Fluor Red   | 7279.98     |
| cattctctggttctggaacc  | nanog-pmc-mrna_20 | 30 nmol | Desalted     | T(CAL Fluor Red   | 7208.93     |
| tattctcggccagttgttt   | nanog-pmc-mrna_21 | 30 nmol | Desalted     | T(CAL Fluor Red   | 7229.96     |
| catccctggtgtaggaaga   | nanog-pmc-mrna_22 | 30 nmol | Desalted     | T(CAL Fluor Red   | 7332.02     |
| gaaggttcccagtcgggttc  | nanog-pmc-mrna_23 | 30 nmol | Desalted     | T(CAL Fluor Red   | 7298.98     |
| caggctctggtgtccacat   | nanog-pmc-mrna_24 | 30 nmol | Desalted     | T(CAL Fluor Red   | 7233.94     |
| gtgtctccaggtgaattgt   | nanog-pmc-mrna_25 | 30 nmol | Desalted     | T(CAL Fluor Red   | 7304.01     |
| ctccaggactggatgttctg  | nanog-pmc-mrna_26 | 30 nmol | Desalted     | T(CAL Fluor Red   | 7273.97     |
| caggctgagtggtccagga   | nanog-pmc-mrna_27 | 30 nmol | Desalted     | T(CAL Fluor Red   | 7323.01     |
| ctgattgtccaggattggg   | nanog-pmc-mrna_28 | 30 nmol | Desalted     | T(CAL Fluor Red   | 7329.02     |
| tatagaagggactgttccag  | nanog-pmc-mrna_29 | 30 nmol | Desalted     | T(CAL Fluor Red   | 7331.04     |
| ggactgcagagattctctc   | nanog-pmc-mrna_30 | 30 nmol | Desalted     | T(CAL Fluor Red   | 7242.95     |
| aaagcagcctcaagtcact   | nanog-pmc-mrna_31 | 30 nmol | Desalted     | T(CAL Fluor Red   | 7204.94     |
| tgctgtattacattaaggcc  | nanog-pmc-mrna_32 | 30 nmol | Desalted     | T(CAL Fluor Red   | 7256.99     |
| atccatggtttgtggagtac  | nanog-pmc-mrna_33 | 30 nmol | Desalted     | T(CAL Fluor Red   | 7313.02     |
| catctcacagcttccagg    | nanog-pmc-mrna_34 | 30 nmol | Desalted     | T(CAL Fluor Red   | 7177.91     |
| ccagtgccagactgaaatt   | nanog-pmc-mrna_35 | 30 nmol | Desalted     | T(CAL Fluor Red   | 7250.98     |
| atcatggaaccagaacacg   | nanog-pmc-mrna_36 | 30 nmol | Desalted     | T(CAL Fluor Red   | 7278.01     |
| cctccatgagattgactgga  | nanog-pmc-mrna_37 | 30 nmol | Desalted     | T(CAL Fluor Red   | 7266.98     |
| tgattaggctccaaccatac  | nanog-pmc-mrna_38 | 30 nmol | Desalted     | T(CAL Fluor Red   | 7210.95     |
| tcaatgttctcttagcagc   | nanog-pmc-mrna_39 | 30 nmol | Desalted     | T(CAL Fluor Red   | 7232.96     |
| tatctatagccagagacggc  | nanog-pmc-mrna_40 | 30 nmol | Desalted     | T(CAL Fluor Red   | 7275.99     |
| tgaggttagattctaacc    | nanog-pmc-mrna_41 | 30 nmol | Desalted     | T(CAL Fluor Red   | 7266        |
| agtatgttacagcttaacc   | nanog-pmc-mrna_42 | 30 nmol | Desalted     | T(CAL Fluor Red   | 7225.97     |
| caaaacagagcaaaaacg    | nanog-pmc-mrna_43 | 30 nmol | Desalted     | T(CAL Fluor Red   | 7296.03     |
| acaaccaacaattagggga   | nanog-pmc-mrna_44 | 30 nmol | Desalted     | T(CAL Fluor Red   | 7302.04     |
| gcagcaatacaagacctct   | nanog-pmc-mrna_45 | 30 nmol | Desalted     | T(CAL Fluor Red   | 7228.97     |
| gtagtactcatgcattacg   | nanog-pmc-mrna_46 | 30 nmol | Desalted     | T(CAL Fluor Red   | 7256.99     |
| ctcggtgaaatcagggtaaa  | nanog-pmc-mrna_47 | 30 nmol | Desalted     | T(CAL Fluor Red   | 7340.05     |
| agctgtatatttactcatcg  | nanog-pmc-mrna_48 | 30 nmol | Desalted     | T(CAL Fluor Red   | 7231.98     |

| Sequence             | Sequence Name    | Scale   | Purification | Three Modificatic MW Backbone |
|----------------------|------------------|---------|--------------|-------------------------------|
| acagacaccaatggttgag  | cdx2-pmc-mrna_1  | 30 nmol | Desalted     | T(CAL Fluor Red 7325.03       |
| acaagactctattagtaatg | cdx2-pmc-mrna_2  | 30 nmol | Desalted     | T(CAL Fluor Red 7274.03       |
| cctccgtgattaacgagtg  | cdx2-pmc-mrna_3  | 30 nmol | Desalted     | T(CAL Fluor Red 7257.97       |
| ggtccgggagcagacctcac | cdx2-pmc-mrna_4  | 30 nmol | Desalted     | T(CAL Fluor Red 7277.95       |
| gaggtagctcacgtacatgg | cdx2-pmc-mrna_5  | 30 nmol | Desalted     | T(CAL Fluor Red 7332.02       |
| ctgacgaagtctcgggcgc  | cdx2-pmc-mrna_6  | 30 nmol | Desalted     | T(CAL Fluor Red 7283.96       |
| acgtggaaccgcgtagtc   | cdx2-pmc-mrna_7  | 30 nmol | Desalted     | T(CAL Fluor Red 7267.96       |
| gactgcgcgtgtccaagtt  | cdx2-pmc-mrna_8  | 30 nmol | Desalted     | T(CAL Fluor Red 7258.95       |
| atacgtgccggccaggatg  | cdx2-pmc-mrna_9  | 30 nmol | Desalted     | T(CAL Fluor Red 7292.97       |
| ctgctgtagccatggctgc  | cdx2-pmc-mrna_10 | 30 nmol | Desalted     | T(CAL Fluor Red 7234.92       |
| cgtttcgagcagcccagaag | cdx2-pmc-mrna_11 | 30 nmol | Desalted     | T(CAL Fluor Red 7276.97       |
| gtttcacttgctgccgag   | cdx2-pmc-mrna_12 | 30 nmol | Desalted     | T(CAL Fluor Red 7264.96       |
| tcgatattgtcttctgcc   | cdx2-pmc-mrna_13 | 30 nmol | Desalted     | T(CAL Fluor Red 7189.93       |
| gctgggtgccgtgtacacc  | cdx2-pmc-mrna_14 | 30 nmol | Desalted     | T(CAL Fluor Red 7274.95       |
| ctttcctcggatggtgatg  | cdx2-pmc-mrna_15 | 30 nmol | Desalted     | T(CAL Fluor Red 7264.96       |
| tttaacctgcctctcagaga | cdx2-pmc-mrna_16 | 30 nmol | Desalted     | T(CAL Fluor Red 7201.94       |
| ttgtctgcggttctgaaa   | cdx2-pmc-mrna_17 | 30 nmol | Desalted     | T(CAL Fluor Red 7263.98       |
| ctctgggacacttctcagag | cdx2-pmc-mrna_18 | 30 nmol | Desalted     | T(CAL Fluor Red 7242.95       |
| gggaagacaccggactcaag | cdx2-pmc-mrna_19 | 30 nmol | Desalted     | T(CAL Fluor Red 7335.02       |
| tgccgctgcagaaccgggtg | cdx2-pmc-mrna_20 | 30 nmol | Desalted     | T(CAL Fluor Red 7268.94       |
| catggctcagcctggaattg | cdx2-pmc-mrna_21 | 30 nmol | Desalted     | T(CAL Fluor Red 7282.98       |
| ctgaggagctagcagagtc  | cdx2-pmc-mrna_22 | 30 nmol | Desalted     | T(CAL Fluor Red 7332.02       |
| ccaggctgtaggtctatgg  | cdx2-pmc-mrna_23 | 30 nmol | Desalted     | T(CAL Fluor Red 7314          |
| gctcccattttctctgag   | cdx2-pmc-mrna_24 | 30 nmol | Desalted     | T(CAL Fluor Red 7159.89       |
| atatttcttgaggcccaaa  | cdx2-pmc-mrna_25 | 30 nmol | Desalted     | T(CAL Fluor Red 7225.97       |
| tggcagaaaaagccagatgg | cdx2-pmc-mrna_26 | 30 nmol | Desalted     | T(CAL Fluor Red 7374.07       |
| cggaggcttctgtctcctc  | cdx2-pmc-mrna_27 | 30 nmol | Desalted     | T(CAL Fluor Red 7200.9        |
| ttctgccagtcggaatgaa  | cdx2-pmc-mrna_28 | 30 nmol | Desalted     | T(CAL Fluor Red 7266.98       |
| gtgtggcagtcaggcaat   | cdx2-pmc-mrna_29 | 30 nmol | Desalted     | T(CAL Fluor Red 7323.01       |
| cctgcagatctaggaagaga | cdx2-pmc-mrna_30 | 30 nmol | Desalted     | T(CAL Fluor Red 7325.03       |
| ctcggctctagccagaggtg | cdx2-pmc-mrna_31 | 30 nmol | Desalted     | T(CAL Fluor Red 7283.96       |
| ctggacctccgagggccatg | cdx2-pmc-mrna_32 | 30 nmol | Desalted     | T(CAL Fluor Red 7268.94       |
| cttccgcagtgtaaccttg  | cdx2-pmc-mrna_33 | 30 nmol | Desalted     | T(CAL Fluor Red 7217.94       |
| agctttctatcttagctgcc | cdx2-pmc-mrna_34 | 30 nmol | Desalted     | T(CAL Fluor Red 7183.92       |
| gttctgcagctttggctcag | cdx2-pmc-mrna_35 | 30 nmol | Desalted     | T(CAL Fluor Red 7279.98       |
| ctgtgcatacaccagccaag | cdx2-pmc-mrna_36 | 30 nmol | Desalted     | T(CAL Fluor Red 7220.94       |
| caggcctggagtccaataac | cdx2-pmc-mrna_37 | 30 nmol | Desalted     | T(CAL Fluor Red 7260.97       |
| ctaaacaagtcctgttcgg  | cdx2-pmc-mrna_38 | 30 nmol | Desalted     | T(CAL Fluor Red 7226.95       |
| gacatacattcagcccagag | cdx2-pmc-mrna_39 | 30 nmol | Desalted     | T(CAL Fluor Red 7244.97       |
| aggaagtcagggtggctct  | cdx2-pmc-mrna_40 | 30 nmol | Desalted     | T(CAL Fluor Red 7323.01       |
| ctctggcttgatgttacac  | cdx2-pmc-mrna_41 | 30 nmol | Desalted     | T(CAL Fluor Red 7248.96       |
| catggatccagaaggcttta | cdx2-pmc-mrna_42 | 30 nmol | Desalted     | T(CAL Fluor Red 7291.01       |
| tctgaaatctgaaagctca  | cdx2-pmc-mrna_43 | 30 nmol | Desalted     | T(CAL Fluor Red 7275.01       |
| gcagacaaaatctgaagata | cdx2-pmc-mrna_44 | 30 nmol | Desalted     | T(CAL Fluor Red 7317.06       |
